# Supplementary material for: Overcoming copper-induced conversion reactions in nickel disulphide anodes for sodium-ion batteries
Source: Royal Society of Chemistry journal article supplement (doi:10.1039/d3na00930k), 2024-01-01
Supplement: d3na00930k1.pdf [file d3na00930k1.pdf]

## Supplementary data

### Overcoming Copper-Induced Conversion Reactions in Nickel Disulphide Anodes for Sodium-Ion Batteries

Milan K. Sadan <sup>a,b\*</sup>, Taehong Kim <sup>b</sup>, Anupriya K. Haridas <sup>c</sup>, Hooam Yu <sup>b</sup>, Denis Cumming <sup>d</sup>, Jou-Hyeon Ahn <sup>b</sup>, and Hyo-Jun Ahn <sup>b\*</sup>

<sup>a,b</sup> Dyson School of Design Engineering, Imperial College London, Imperial College Rd, South Kensington, London SW7 2DB, United Kingdom.

<sup>b</sup>Department of Materials Engineering and Convergence Technology, Gyeongsang National University, Jinju 52828, Republic of Korea.

<sup>c</sup>Energy Innovation Centre, Warwick Manufacturing Group, University of Warwick, Coventry, CV4 7AL, United Kingdom.

<sup>d</sup>Department of Chemical and Biological Engineering, Mappin Street, University of Sheffield, Sheffield S1 3JD, United Kingdom.

\*Corresponding authors.

Prof. Hyo-Jun Ahn

E-mail: [ahj@gnu.ac.kr](mailto:ahj@gnu.ac.kr)

Milan K. Sadan

E-mail: [m.kooplikkattil-sadan@imperial.ac.uk](mailto:m.kooplikkattil-sadan@imperial.ac.uk)

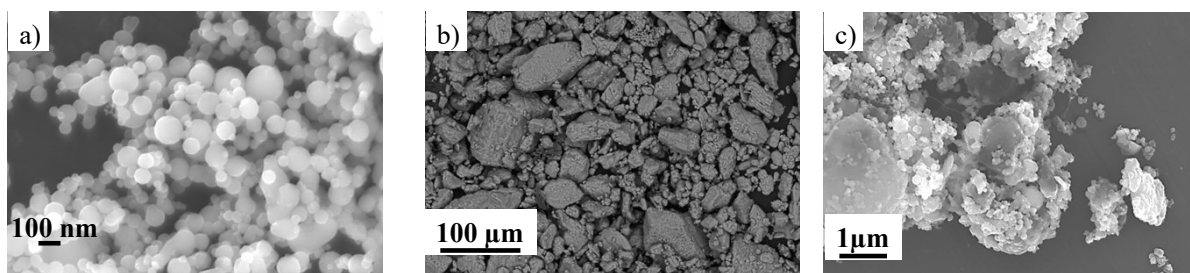

Figure S1. FESEM image of precursor: (a) nickel nanoparticle, (b) sulphur particle, and (c) nickel-sulphur mixture after ball milling.

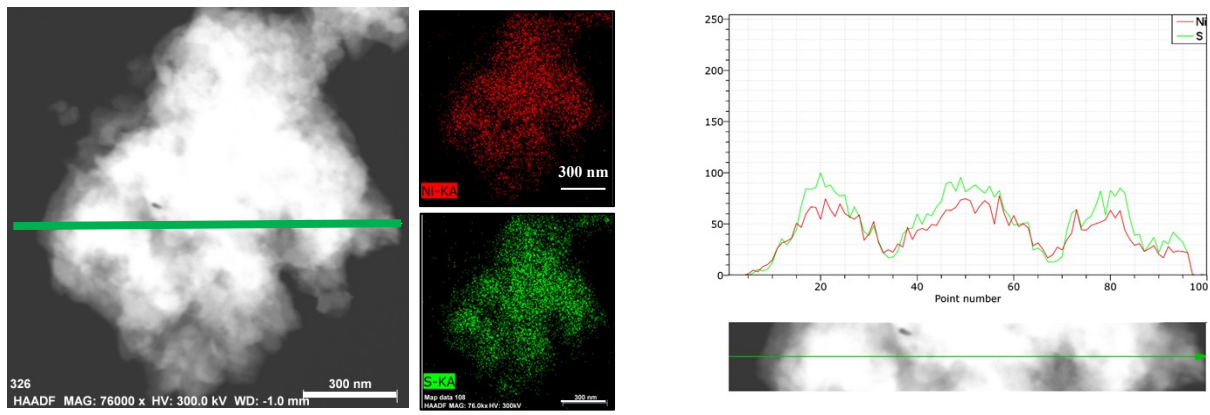

Figure S2. EDS mapping in STEM mode of nickel disulphide respectively.

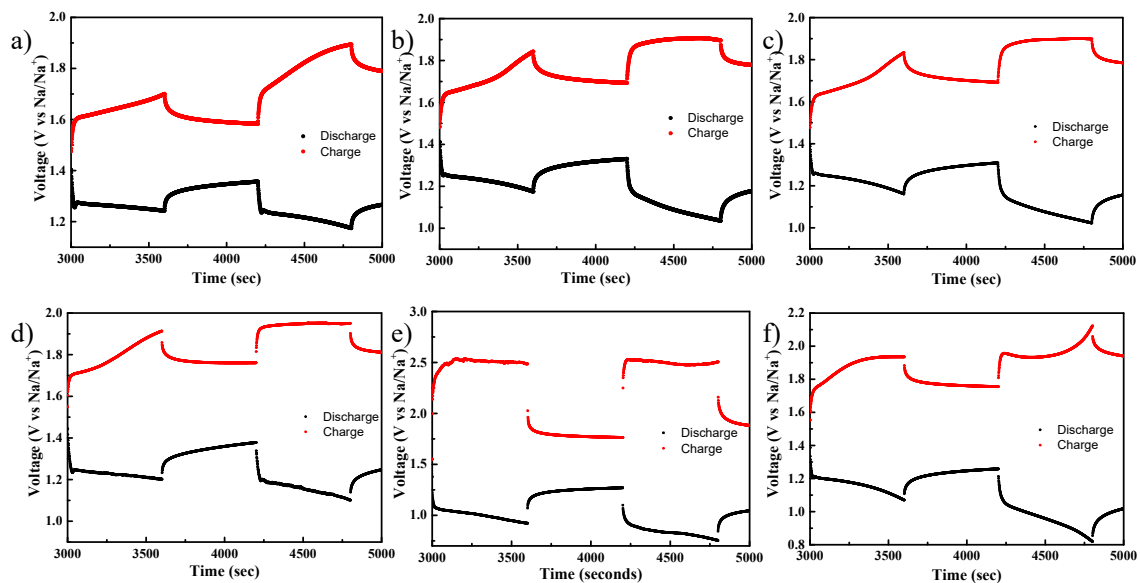

Figure S3. GITT profile of NiS<sub>2</sub> on different current collector: a) C/Al foil, b) nickel foil, c) SS foil, d) Ti foil, e) Al foil and f) CNT coated Al foil in ether electrolyte.

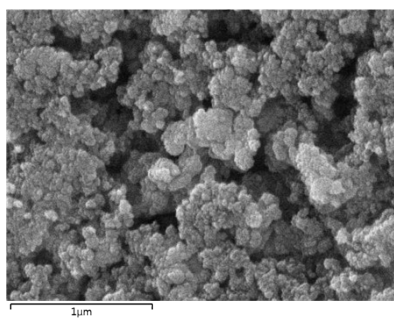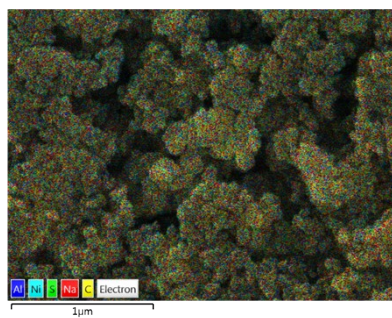

| Element | Wt%    |
|---------|--------|
| C       | 41.51  |
| Na      | 28.42  |
| Al      | 0.23   |
| S       | 11.99  |
| Ni      | 17.86  |
| Total:  | 100.00 |

Figure S4. EDS mapping of the electrode after 50 cycles in ether electrolyte.

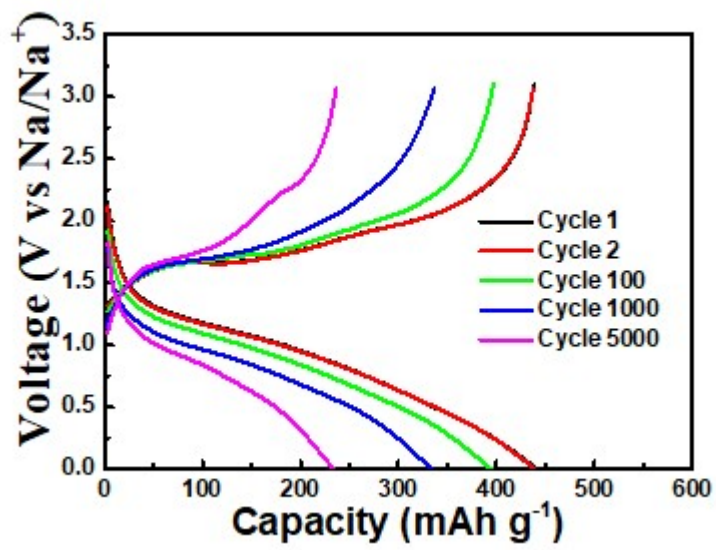

Figure S5. Corresponding voltage profile of NiS<sub>2</sub> electrode on C/Al current collector in ether electrolyte while long-term cycling at 50 Ag<sup>-1</sup>.

Table S1. Comparison of the previous report of nickel disulphide (NiS<sub>2</sub>) as anode material for sodium-ion batteries.

| Electrode                                              | Electrolyte                               | Carbon                    | Current collector    | Voltage window | First reversible capacity (current density) | Cycle performance mAh/g (cycle number, current density) | Rate performance | Ref |
|--------------------------------------------------------|-------------------------------------------|---------------------------|----------------------|----------------|---------------------------------------------|---------------------------------------------------------|------------------|-----|
| NiS <sub>2</sub> -GNS                                  | 1 M NaClO <sub>4</sub> in EC:DMC +5 % FEC | 50 %                      | stainless steel mesh | –              | 407 (100 mA/g)                              | 313(200,100 mA/g)                                       | 168 (1614 mA/g)  | S1  |
| NiS <sub>2</sub> @CoS <sub>2</sub> hetero-nanocrystals | 1.25 M NaPF <sub>6</sub> in EMC           | 51 %                      | copper foil          | 0.01–3.0 V     | –                                           | 600(250,1000 mA/g)                                      | 560 @ 5 A/g)     | S2  |
| Ni-MOFs-derived NiS <sub>2</sub>                       | 1 M NaClO <sub>4</sub> in EC:DEC+ 1 % FEC | 31.2 %                    | copper foil          | 0.01–3.0 V     | 441 (mA/g)                                  | 186.9 (100, 500mA/g)                                    | 209.8 @ 0.5 A/g) | S3  |
| Mesoporous NiS <sub>2</sub> Nanospheres                | 1 M NaClO <sub>4</sub> in DEGDME          | Present but not mentioned | Titanium foil        | 0.4-2.9 V      | 692 (100 mA/g)                              | 319 (1000, 500 mA/g)                                    | 253 @ 5A/g       | S4  |
| Yolk–Shell NiS <sub>2</sub> Nanoparticle               | 1 M NaClO <sub>4</sub> in EC:PC+ 2 % FEC  | 61 %                      | Free standing        | 0.01–3 V       | 679 (0.1C)                                  | 275 (5000, 5C)                                          | 245 @ 10C        | S5  |
| Hollow NiS <sub>2</sub> spheres                        | 1.0 M NaPF <sub>6</sub> in DEGDME         | 17 %                      | Copper foil          | 0.05–3 V       | 746(100 mA/g)                               | 530 (300,1A/g)                                          | 527.8 @2A/g      | S6  |
| NiS <sub>2</sub> /nitrogen doped carbon hybrid         | 1 M NaClO <sub>4</sub> in EC:PC+ 5 % FEC  | 26 %                      | Copper foil          | 0.005-3 V      | 559.1 (100 mA/g)                            | 356 (300, 500 mA/g)                                     | 294 @ 3A/g       | S7  |
| NiS <sub>2</sub> in N-doped carbon                     | 1 M NaClO <sub>4</sub> in EC:PC+ 5 % FEC  | 50.6 %                    | Copper foil          | 0.01–3 V       | 669(100 mA/g)                               | 580(100, 100mA/g)                                       | 448 @1.6 A/g     | S8  |
| NiS <sub>2</sub> NP/p-CNF                              | 1 M NaClO <sub>4</sub> in EC:PC+ 5 % FEC  | 54 %                      | Copper foil          | 0.01–3 V       | 628 (100 mA/g)                              | 200(2000, 2A/g)                                         | 300@2A/g         | S9  |

|                                                            |                                                |                           |               |             |                   |                      |               |     |
|------------------------------------------------------------|------------------------------------------------|---------------------------|---------------|-------------|-------------------|----------------------|---------------|-----|
| NiS <sub>2</sub> nanosheets on carbon micro tube           | 1M NaClO <sub>4</sub> in EC/DMC + 5%FEC        | Present but not mentioned | Copper foil   | 0.01–3 V    | 926 (100 mA/g)    | 640 (5000, 1A/g)     | 431 @ 8A/g    | S10 |
| SnS <sub>2</sub> /NiS <sub>2</sub> hetero-nanosheet arrays | 1 M NaPF <sub>6</sub> in PC + 5 % FEC          | 45 %                      | Free standing | 0.005–3.0 V | 857 (200 mA/g)    | 588 (100, 0.5 A/g)   | 360 @ 5A/g    | S11 |
| NiS <sub>2</sub>                                           | 1M NaCF <sub>3</sub> SO <sub>3</sub> in DEGDME | Present but not mentioned | Copper foil   | 0.005–3.0 V | ~700 (1000 mA/g)  | 480(200, 1 A/g)      | –             | S12 |
| NiS <sub>2</sub> /RGO                                      | 1M NaCF <sub>3</sub> SO <sub>3</sub> in DEGDME | 23.4 %                    | Copper foil   | 0.01-3.0 V  | 785.79 (100 mA/g) | 267 (50, 0.1 A/g)    | 300 @ 5 A/g   | S13 |
| NiS <sub>2</sub> /Graphene                                 | 1 M NaClO <sub>4</sub> in EC/DEC + 5%FEC       | 25 %                      | Not mentioned | 0.05-3.0 V  | 1213 (100 mA/g)   | 900.7 (100, 0.1 A/g) | 580.6 @ 5 A/g | S14 |
| NiS <sub>2</sub> nanosheet arrays                          | 1 M NaClO <sub>4</sub> in PC + 5%FEC           | Present but not mentioned | SS            | 0.01- 3.0 V | 783.16 (0.1C)     | 469.9 (100, 0.1C)    | 492 @5C       | S15 |
| G/NiS <sub>2</sub> -MoS <sub>2</sub>                       | 1 M NaClO <sub>4</sub> in EC/DEC               | Present but not mentioned | Cu foil       | 0.01- 3.0 V | 509.6 (500 mA/g)  | 337(500, 0.5A/g)     | 424.5 @ 2A/g  | S16 |
| NiS <sub>2</sub> nanospheres                               | 1 M NaClO <sub>4</sub> in DME                  | 21.49%                    | Cu foil       | 0.01- 3.0 V | 591 (200 mA/g)    | 436.3 (800, 1A/g)    | 411 @ 2A/g    | S17 |
| This Report                                                | 1M NaPF <sub>6</sub> in DME                    | –                         | Cu foil       | 0.01- 3.0 V | 812 (1000 mA/g)   | 814 (100, 1A/g)      | 132 @100 A/g  |     |
|                                                            | 1 M NaPF <sub>6</sub> in EC/DEC                |                           | Cu foil       | 0.01- 3.0 V | 629 (1000 mA/g)   | 25 (100, 1A/g)       | –             |     |
|                                                            | 1M NaPF <sub>6</sub> in DME                    |                           | C/Al foil     | 0.01- 3.0 V | 768 (1000 mA/g)   | 241(5000, 50 A/g)    | 129 @ 100 A/g |     |

## References

- S1. Wang, T.; Hu, P.; Zhang, C.; Du, H.; Zhang, Z.; Wang, X.; Chen, S.; Xiong, J.; Cui, G., *ACS Appl Mater Interfaces* 2016, 8 (12), 7811-7. DOI: 10.1021/acsami.6b00179.
- S2. Lin, Y.; Qiu, Z.; Li, D.; Ullah, S.; Hai, Y.; Xin, H.; Liao, W.; Yang, B.; Fan, H.; Xu, J.; Zhu, C., *Energy Storage Mater.* 2018, 11, 67-74. DOI: 10.1016/j.ensm.2017.06.001.
- S3. Zhu, K. J.; Liu, G.; Wang, Y. J.; Liu, J.; Li, S. T.; Yang, L. Y.; Liu, S. L.; Wang, H.; Xie, T., *Mater. Lett.* 2017, 197, 180-183. DOI: 10.1016/j.matlet.2017.03.087.
- S4. Sun, R.; Liu, S.; Wei, Q.; Sheng, J.; Zhu, S.; An, Q.; Mai, L., *Small* 2017, 13 (39). DOI: 10.1002/smll.201701744.



- S5. Chen, Q.; Sun, S.; Zhai, T.; Yang, M.; Zhao, X.; Xia, H., *Adv. Energy Mater.* 2018, 8 (19). DOI:10.1002/aenm.201800054.
- S6. Bi, R.; Zeng, C.; Huang, H.; Wang, X.; Zhang, L., *J. Mater. Chem. A* 2018, 6 (29), 14077-14082. DOI: 10.1039/c8ta05554h.
- S7. Li, J.; Li, J.; Yan, D.; Hou, S.; Xu, X.; Lu, T.; Yao, Y.; Mai, W.; Pan, L., *J. Mater. Chem. A* 2018, 6 (15), 6595-6605. DOI: 10.1039/c8ta00557e.
- S8. Zhao, G.; Zhang, Y.; Yang, L.; Jiang, Y.; Zhang, Y.; Hong, W.; Tian, Y.; Zhao, H.; Hu, J.; Zhou, L.; Hou, H.; Ji, X.; Mai, L., *Adv. Funct. Mater.* 2018, 28 (41). DOI : S10.1002/adfm.201803690.
- S9. Zhao, W.; Ci, S.; Hu, X.; Chen, J.; Wen, Z., *Nanoscale* 2019, 11 (11), 4688-4695. DOI: 10.1039/c9nr00160c.
- S10. Zhao, J.; Wang, G.; Cheng, K.; Ye, K.; Zhu, K.; Yan, J.; Cao, D.; Wang, H.-E., *J. Power Sources* 2020, 451. DOI: 10.1016/j.jpowsour.2020.227737.
- S11. Guan, S.; Wang, T.; Fu, X.; Fan, L.-Z.; Peng, Z., *Appl. Surf. Sci.* 2020, 508. DOI: 10.1016/j.apsusc.2019.145241.
- S12. Li, Q.; Wei, Q.; An, Q.; Huang, L.; Luo, W.; Ren, X.; Owusu, K. A.; Dong, F.; Li, L.; Zhou, P.; Mai, L.; Zhang, Q.; Amine, K.; Lu, J., *Energy Storage Mater.* 2019, 16, 625-631. DOI: 10.1016/j.ensm.2018.07.002.
- S13. Zheng, H.; Chen, X.; Li, L.; Feng, C.; Wang, S., *Mater. Res. Bull.* 2021, 142. DOI: 10.1016/j.materresbull.2021.111430.
- S14. Wang, L.; Han, Z.; Zhao, Q.; Yao, X.; Zhu, Y.; Ma, X.; Wu, S.; Cao, C., *J. Mater. Chem. A* 2020, 8 (17), 8612-8619. DOI: 10.1039/d0ta02568b.
- S15. Fan, M.-P.; Chen, Y.-C.; Chen, Y.-M.; Huang, Z.-X.; Wu, W.-L.; Wang, P.; Ke, X.; Sun, S.-H.; Shi, Z.-C., *Rare Metals* 2022, 41 (4), 1294-1303. DOI: 10.1007/s12598-021-01890-2.
- S16. Huang, J.; Yao, Y.; Huang, M.; Zhang, Y.; Xie, Y.; Li, M.; Yang, L.; Wei, X.; Li, Z., *Small* 2022, 18 (18), e2200782. DOI: 10.1002/sml.202200782.
- S17. Zhang, W. X.; Zhang, J. H.; Guo, J. Q.; He, C.; Wen, J. R., *J. Alloys Compd.* 2023, 937. DOI: 10.1016/j.jallcom.2022.168379.
